# Supplementary material for: New rhodamine B-based chromo-fluorogenic probes for highly selective detection of aluminium(iii) ions and their application in living cell imaging
Source: Royal Society of Chemistry journal article supplement (doi:10.1039/c8ra09850f), 2019-01-01
Supplement: c8ra09850f1.pdf [file c8ra09850f1.pdf]

## Supporting Information

### **New rhodamine B-based chromo-fluorogenic probes for highly selective detection of aluminium(III) ion and their application in living cell imaging**

Xin Leng,<sup>‡a</sup> Wenfeng Xu,<sup>‡a</sup> Chengfang Qiao,<sup>\*b</sup> Xu Jia,<sup>a</sup> Ying Long,<sup>a</sup> and Bingqin Yang<sup>\*a</sup>

<sup>a</sup> *Key Laboratory of Synthetic and Natural Functional Molecule Chemistry, Ministry of Education, College of Chemistry and Materials Science, Northwest University, Xi'an 710127, China.*

<sup>b</sup> *Shaanxi Key Laboratory of Comprehensive Utilization of Tailings Resources, College of Chemical Engineering and Modern Materials, Shangluo University, Shangluo 726000, China.*

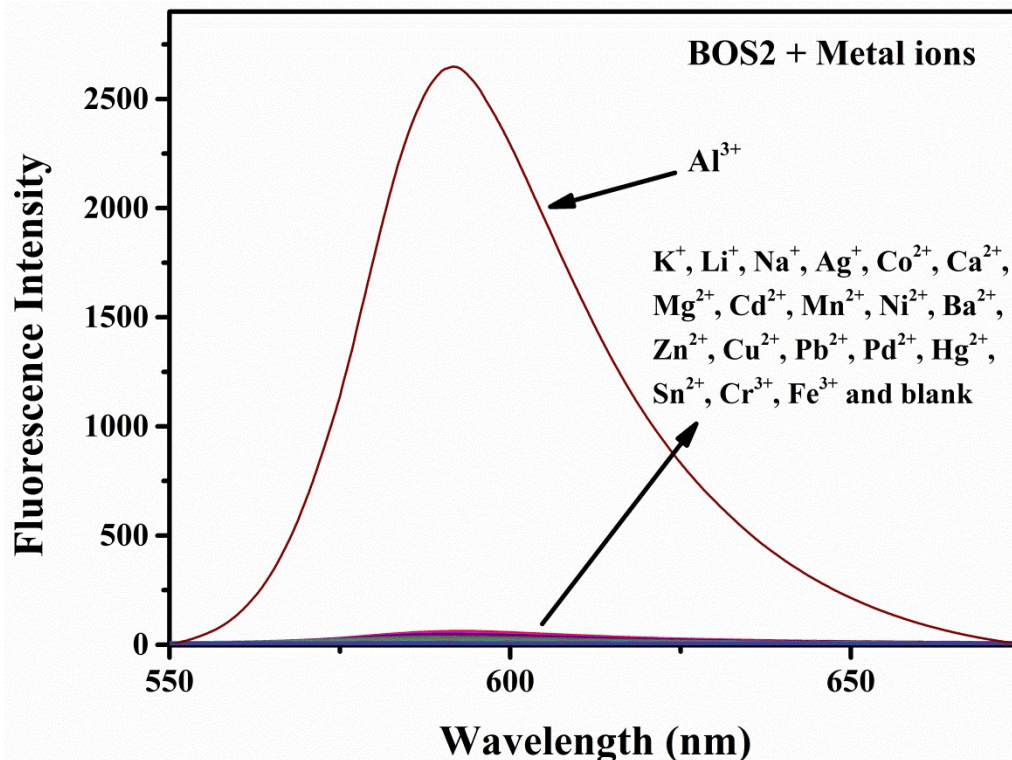

**Fig. S1** Fluorescence spectra of **BOS2** (10  $\mu\text{M}$ ) in ethanol-water (1:9, v/v, Tris-HCl, pH =7.2) solution upon addition of various metal ions (10  $\mu\text{M}$ ).

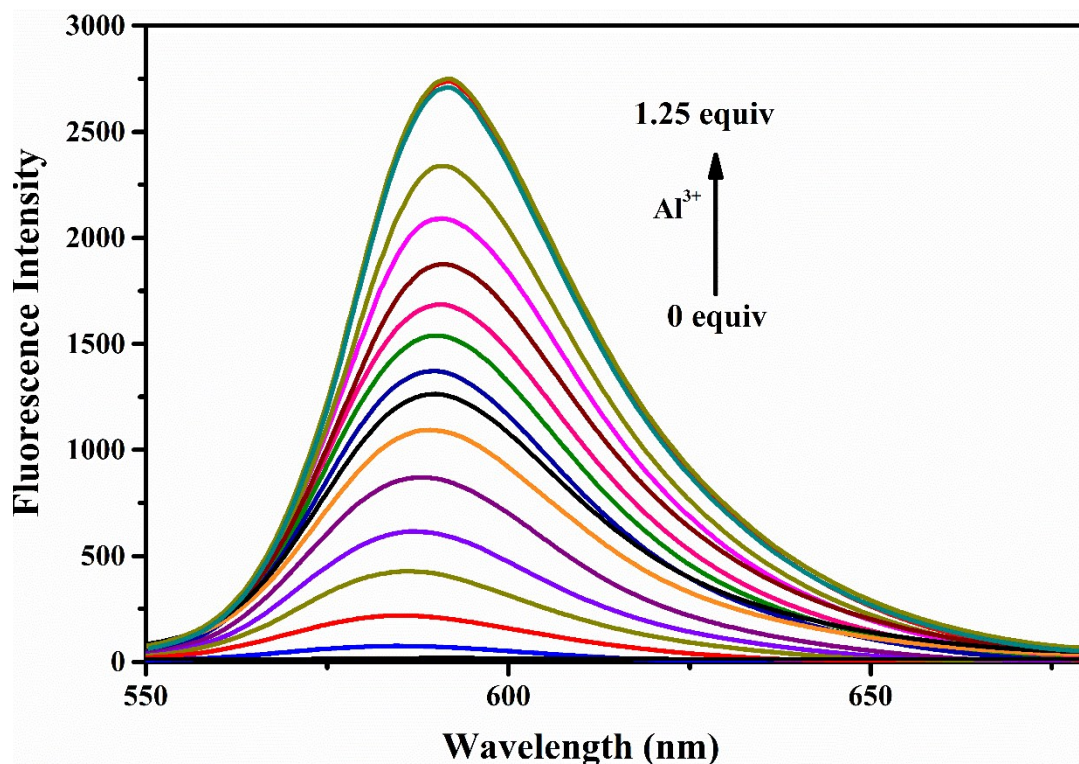

**Fig. S2** Fluorescence spectra of **BOS2** (10  $\mu\text{M}$ ) with the addition of various concentrations of  $\text{Al}^{3+}$  ions (0–12.5  $\mu\text{M}$ ) in ethanol-water (1:9, v/v, Tris-HCl, pH =7.2) solution.

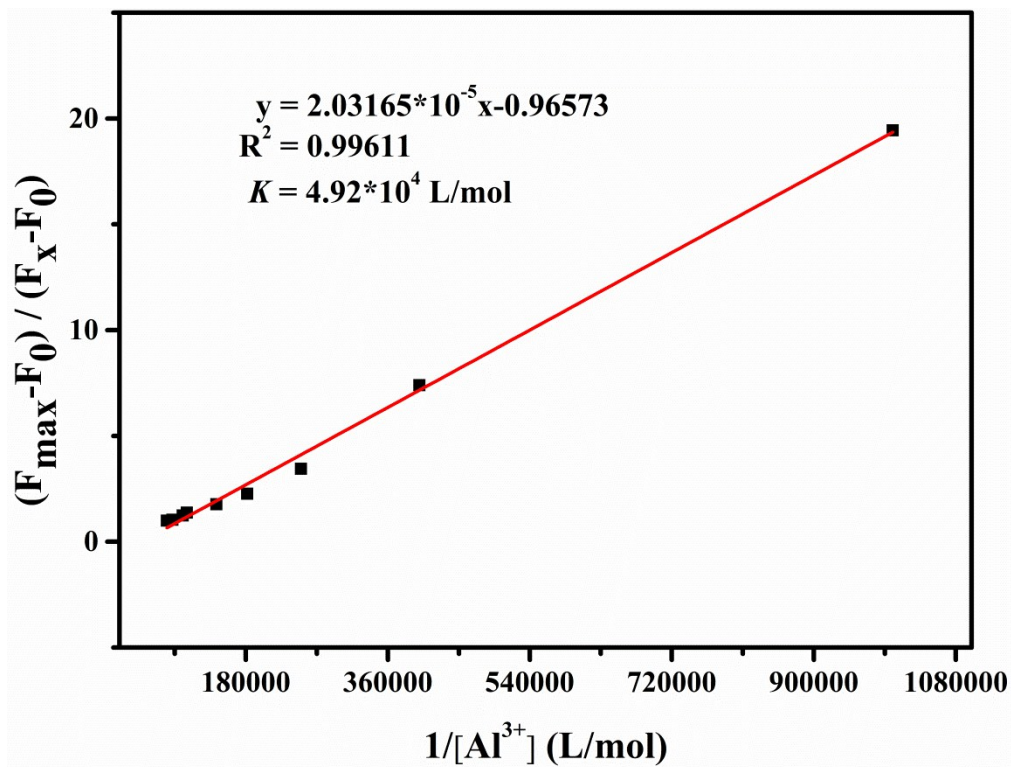

Fig. S3 Determination of binding constant of BOS2 with  $\text{Al}^{3+}$  using Benesi–Hildebrand equation.

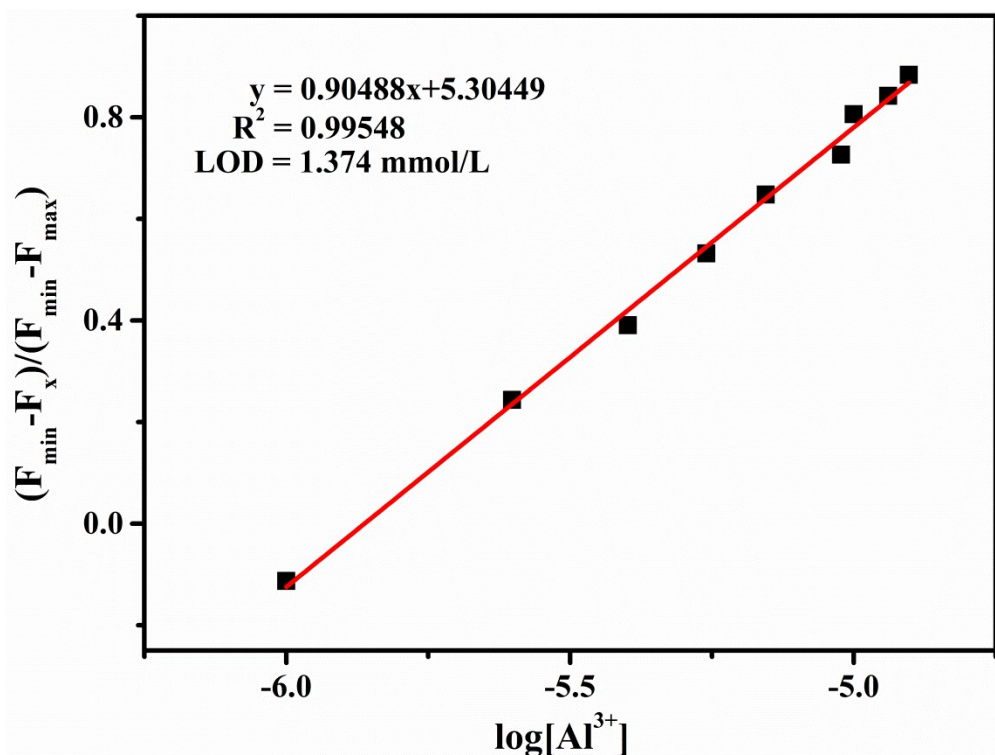

Fig. S4 The plot of  $(F_{\min} - F_x) / (F_{\min} - F_{\max})$  versus  $\log[\text{Al}^{3+}]$  for the probe BOS2.



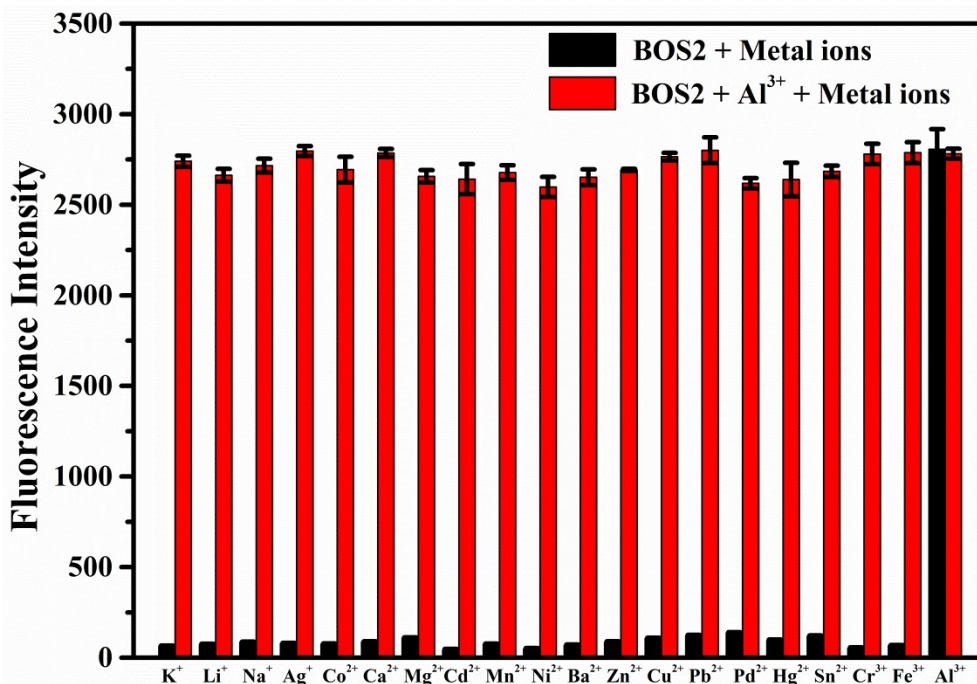

**Fig. S5** Fluorescence intensity changes of **BOS2** (10  $\mu\text{M}$ ) upon the addition of various metal ions (10  $\mu\text{M}$ ) in the presence of  $\text{Al}^{3+}$  (10  $\mu\text{M}$ ) in ethanol-water (1:9, v/v, Tris-HCl, pH =7.2) solution. The black bars represent the fluorescence response of **BOS2** and metal ions. The red bars represent the subsequent addition of 10  $\mu\text{M}$   $\text{Al}^{3+}$  to the above solutions.

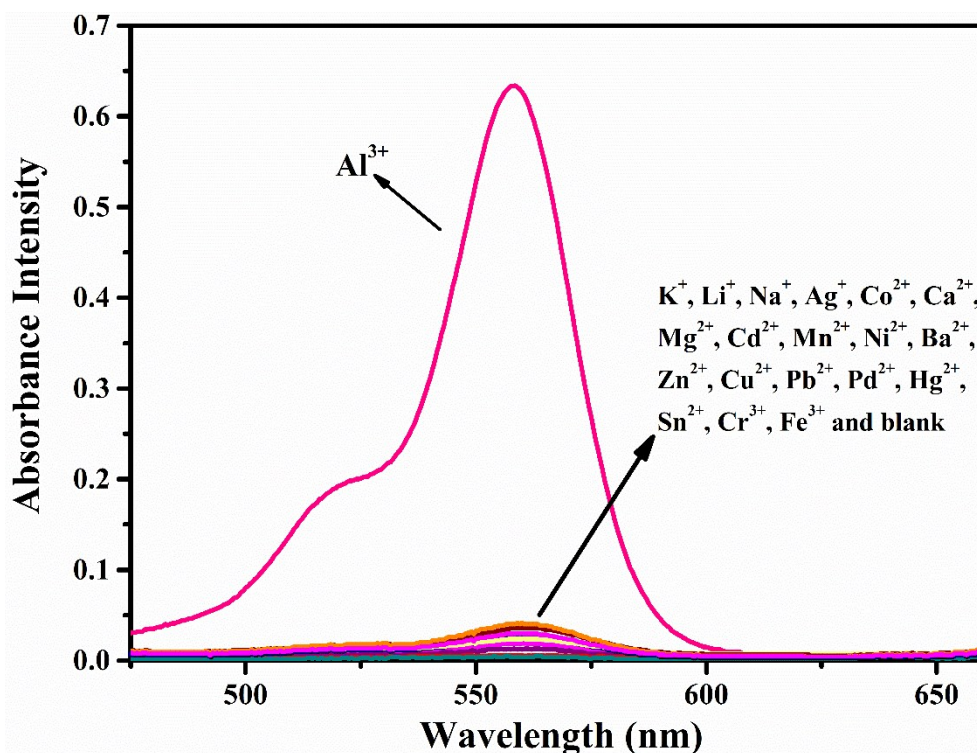

**Fig. S6** UV-vis absorption spectra of **BOS2** (10  $\mu\text{M}$ ) in ethanol-water (1:9, v/v, Tris-HCl, pH =7.2) solution upon addition of various metal ions (10  $\mu\text{M}$ ).

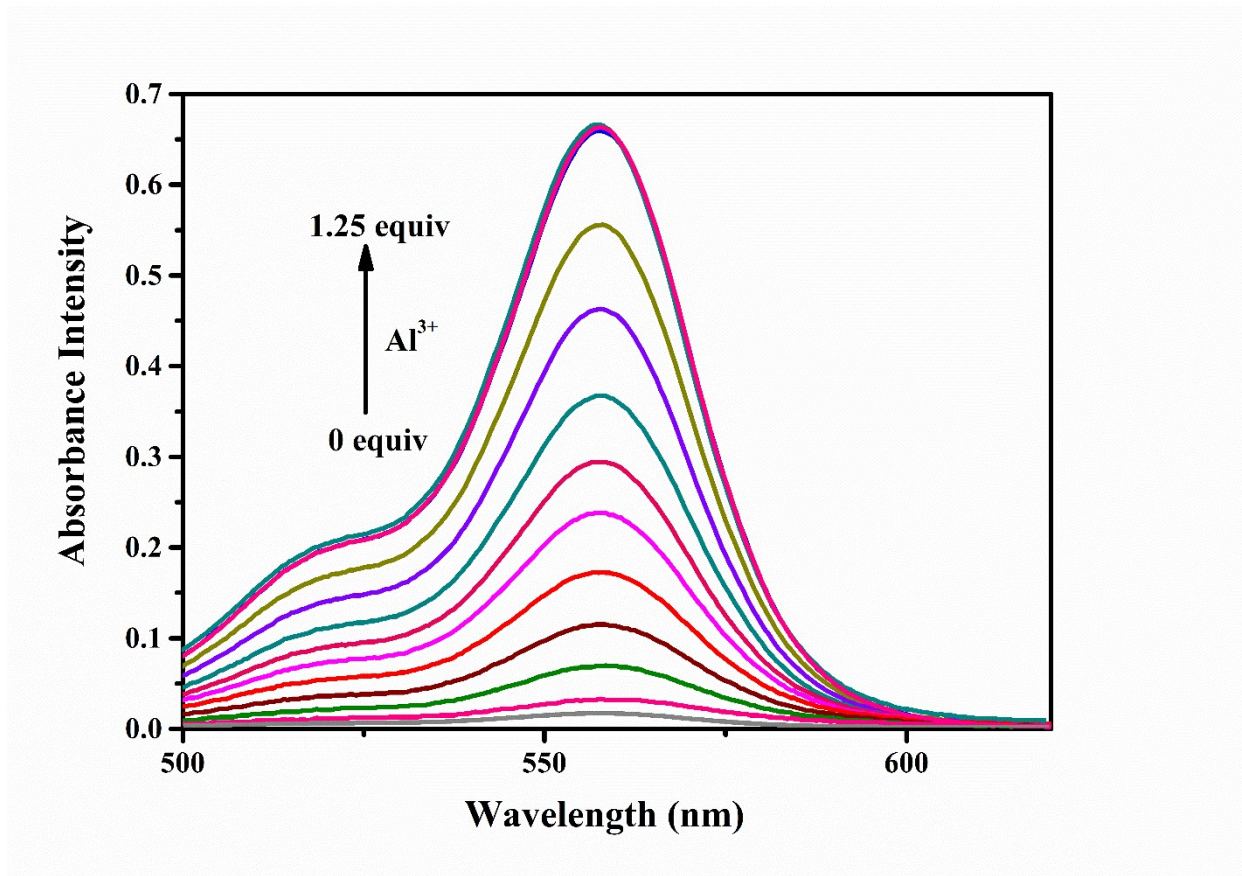

**Fig. S7** UV-vis absorption spectra of **BOS2** (10  $\mu\text{M}$ ) with the addition of various concentrations of  $\text{Al}^{3+}$  ions (0–12.5  $\mu\text{M}$ ) in ethanol-water (1:9, v/v, Tris-HCl, pH =7.2) solution.

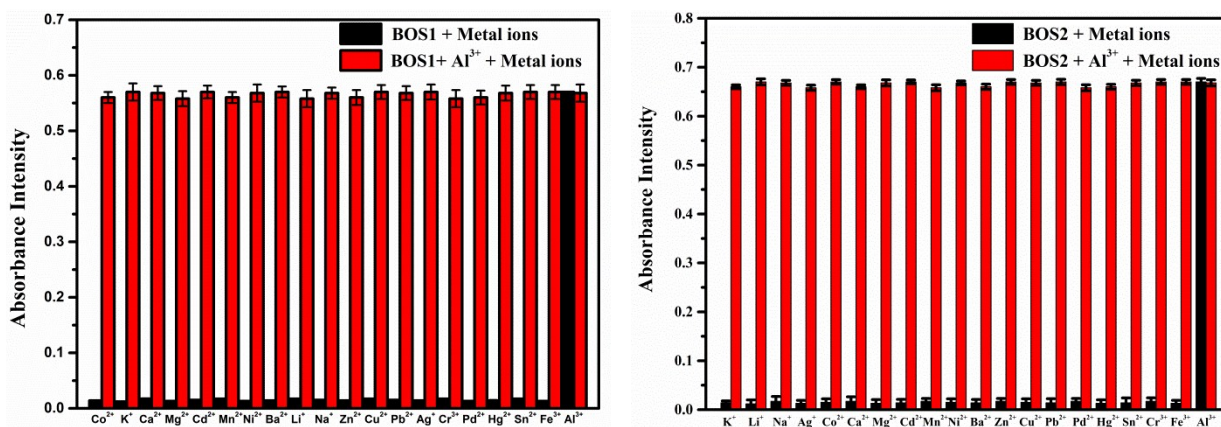

**Fig. S8** UV-vis absorption intensity changes of 10  $\mu\text{M}$  **BOS1** (left) and **BOS2** (right) upon the addition of various metal ions (10  $\mu\text{M}$ ) in the presence of  $\text{Al}^{3+}$  (10  $\mu\text{M}$ ) in ethanol-water (1:9, v/v, Tris-HCl, pH =7.2) solution. The black bars represent the absorption response of probes and metal ions. The red bars represent the subsequent addition of 10  $\mu\text{M}$   $\text{Al}^{3+}$  to the above solutions.



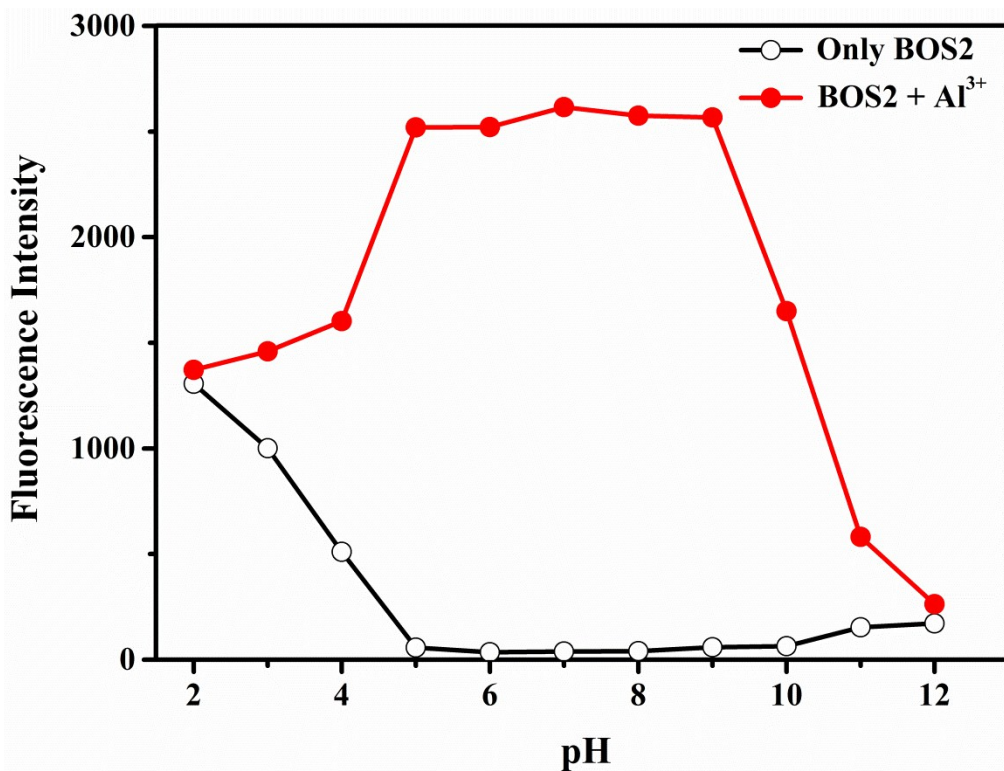

**Fig. S9** Effects of pH on **BOS2** (10 μM) response to  $\text{Al}^{3+}$  (the pH of solution was adjusted by aqueous solution of NaOH (1 mol/L) and HCl (1 mol/L)).

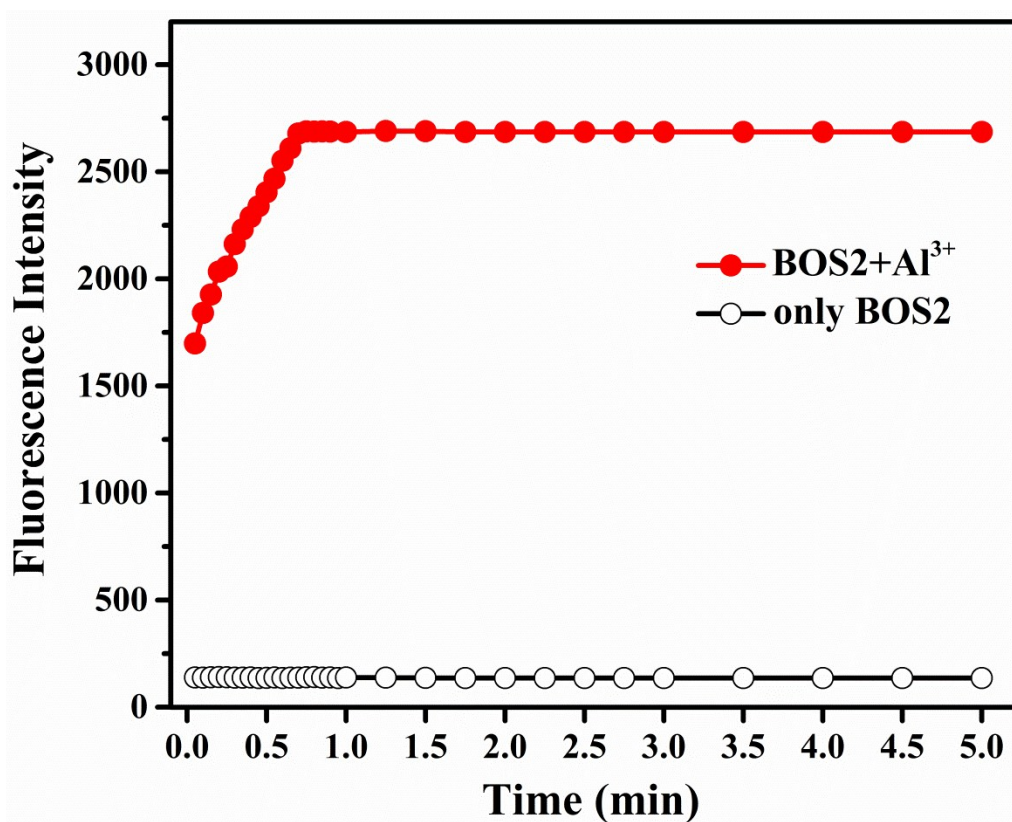

**Fig. S10** Effects of time on **BOS2** (10 μM) response to  $\text{Al}^{3+}$  in ethanol-water (1:9, v/v, Tris-HCl, pH = 7.2) solutions.

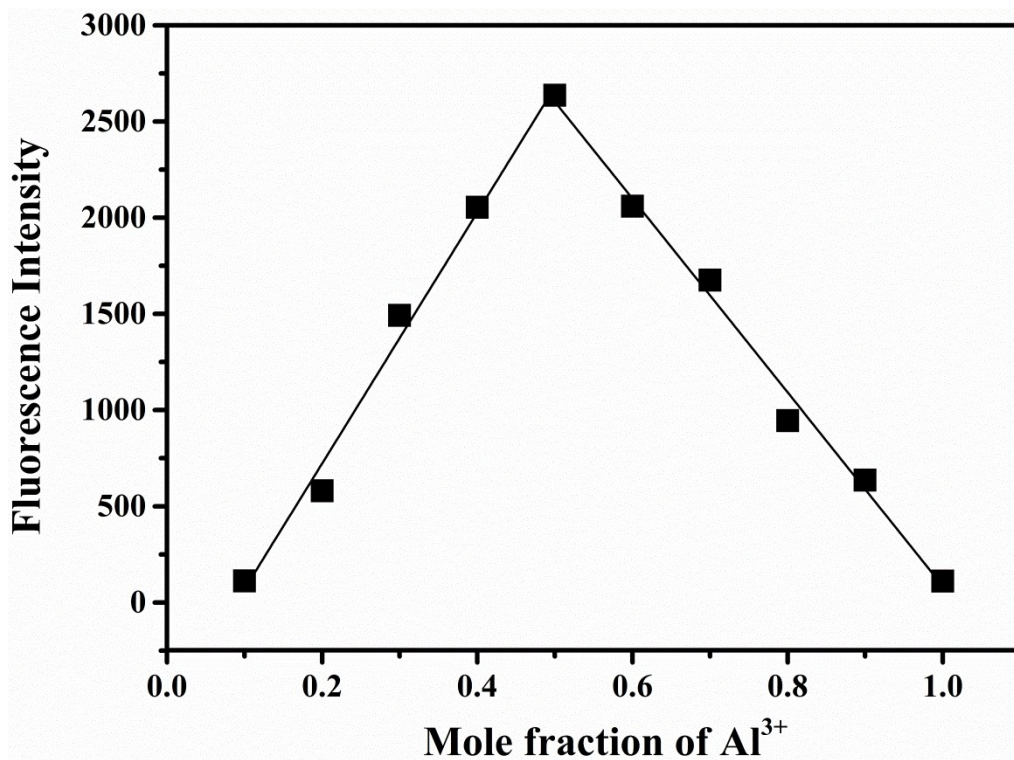

**Fig. S11** Job's plot of **BOS2** and  $\text{Al}^{3+}$  (the total concentration was 10  $\mu\text{M}$ ).

**Table S1** Cytotoxicity data of **BOS1**, **BOS2** and  $\text{Al}^{3+}$  (SGC 7901, 24h)

| concentration<br>( $\mu\text{mol/L}$ ) | <b>BOS1</b>   |                 | <b>BOS2</b>   |                 | $\text{Al}^{3+}$ |                 |
|----------------------------------------|---------------|-----------------|---------------|-----------------|------------------|-----------------|
|                                        | Abs           | Cell survival % | Abs           | Cell survival % | Abs              | Cell survival % |
| 6.25                                   | 1.0094±0.1342 | 89.11           | 0.9187±0.0580 | 99.64           | 0.9566±0.0665    | 96.50           |
| 12.50                                  | 0.9627±0.0424 | 85.01           | 0.8667±0.0694 | 94.01           | 0.8813±0.0155    | 88.90           |
| 25.00                                  | 0.9573±0.1231 | 84.52           | 0.8333±0.0820 | 90.38           | 0.8583±0.0156    | 86.58           |
| 50.00                                  | 0.8753±0.0522 | 77.28           | 0.8267±0.0427 | 89.66           | 0.7807±0.0171    | 78.75           |
| 100.00                                 | 0.8547±0.0775 | 75.46           | 0.7920±0.0457 | 85.90           | 0.7250±0.0655    | 73.13           |
| Blank                                  | 1.1327±0.0808 | -----           | 0.9220±0.0125 | -----           | 0.9913±0.0045    | -----           |

### Mass Spectrum SmartFormula Report

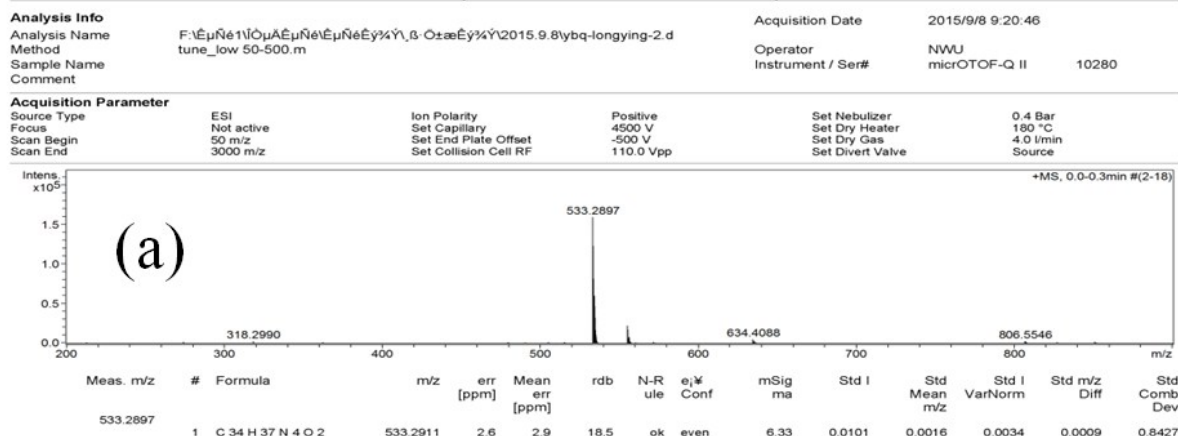

### Mass Spectrum SmartFormula Report

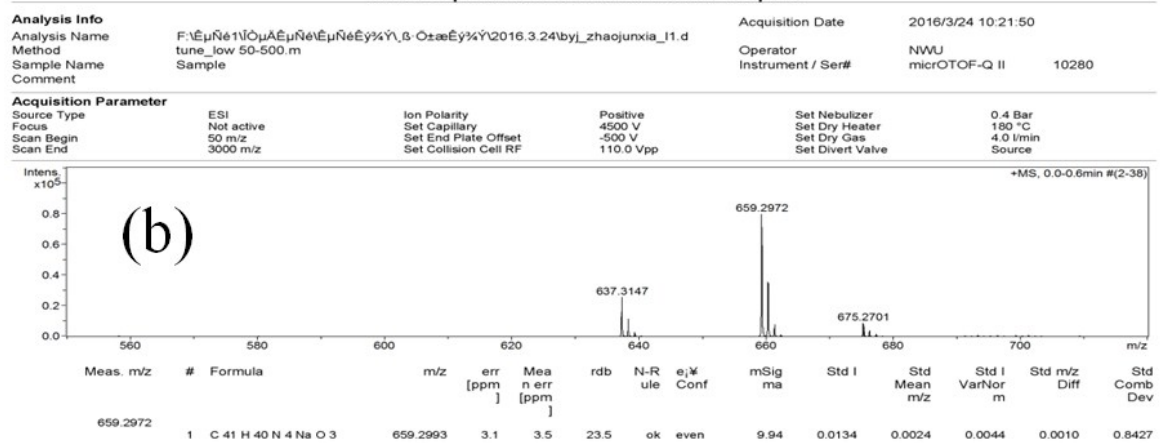

### Mass Spectrum SmartFormula Report

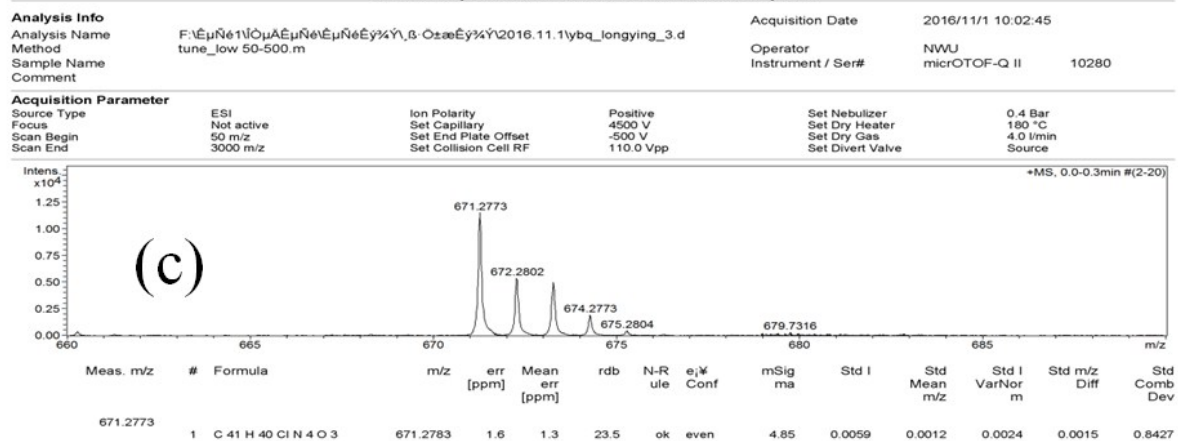

Fig. S12 ESI-MS spectra of RBO (a), BOS1 (b), BOS2 (c).



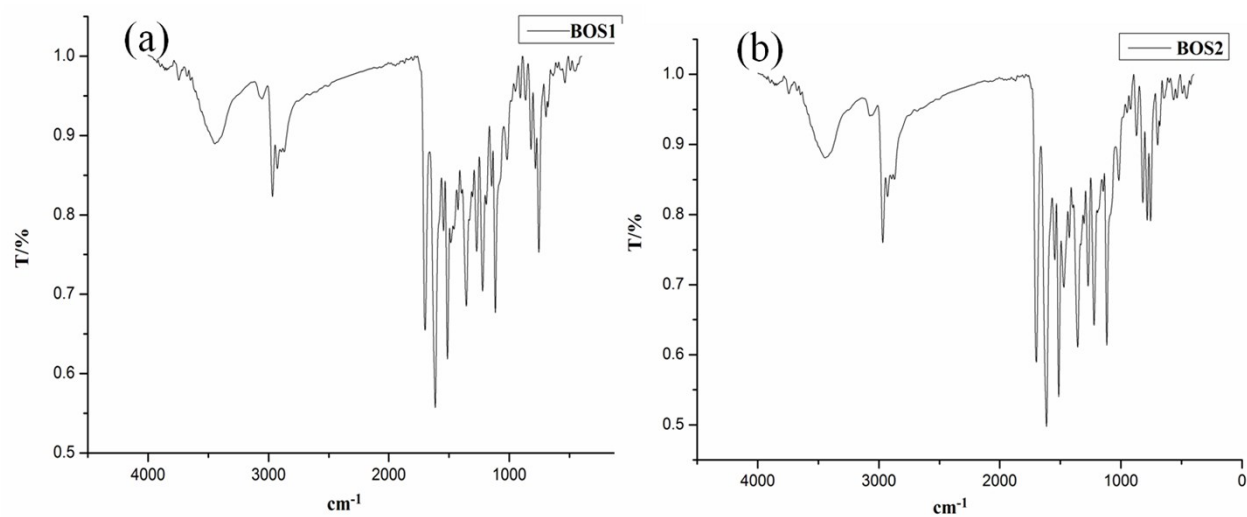

**Fig. S13** The IR spectra of **BOS1** (a) and **BOS2** (b).

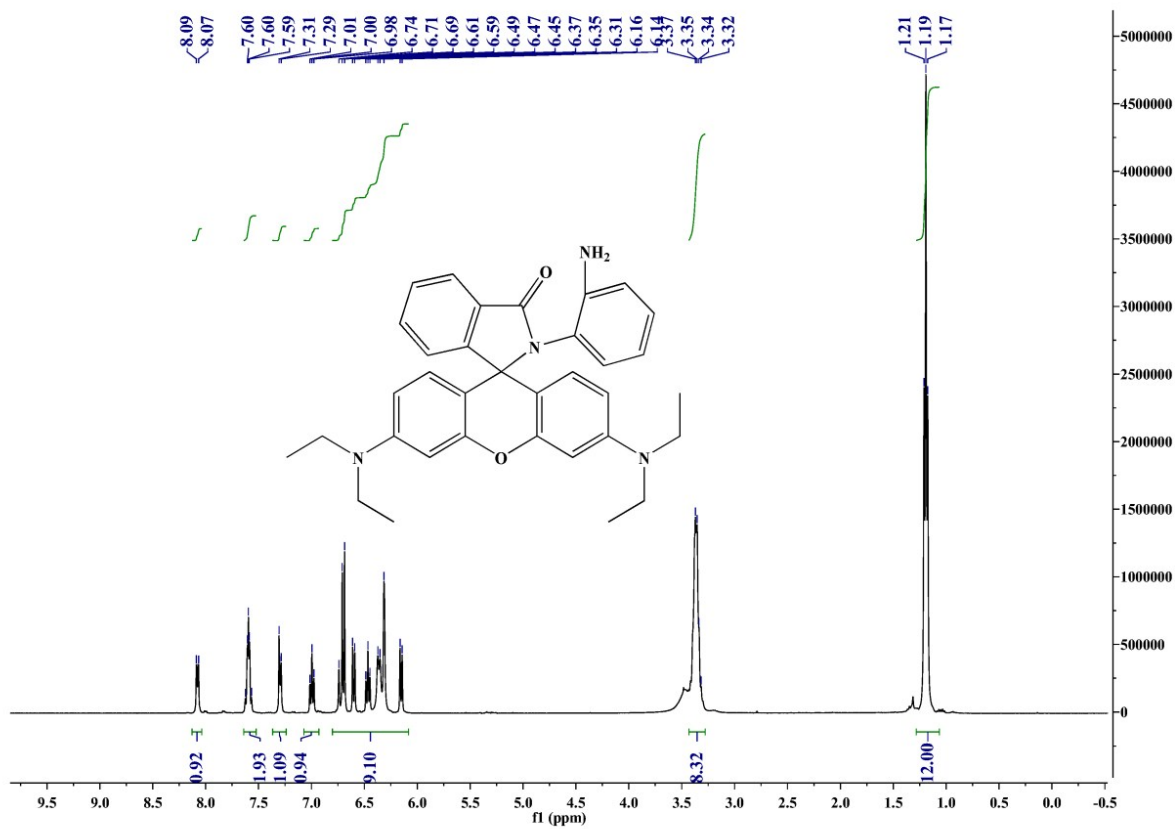

**Fig. S14** The  $^1\text{H}$  NMR spectrum of **RBO** in  $\text{CDCl}_3$ .

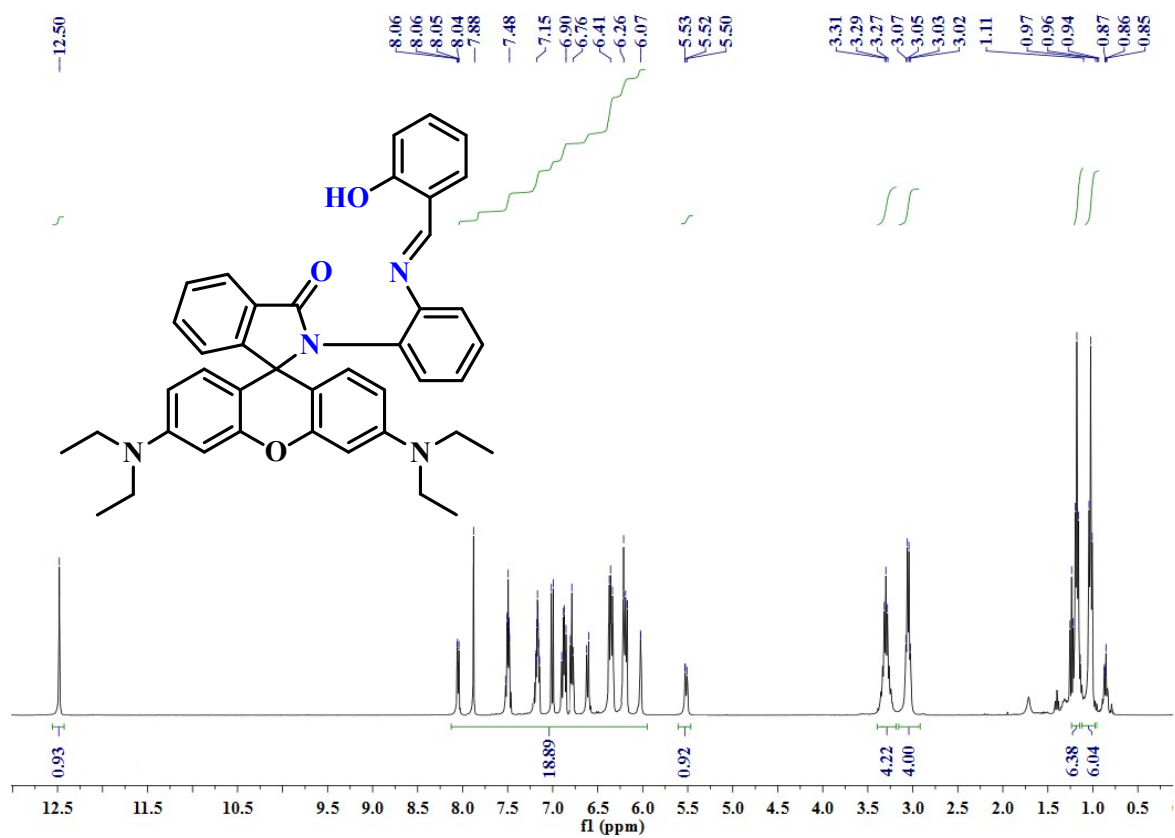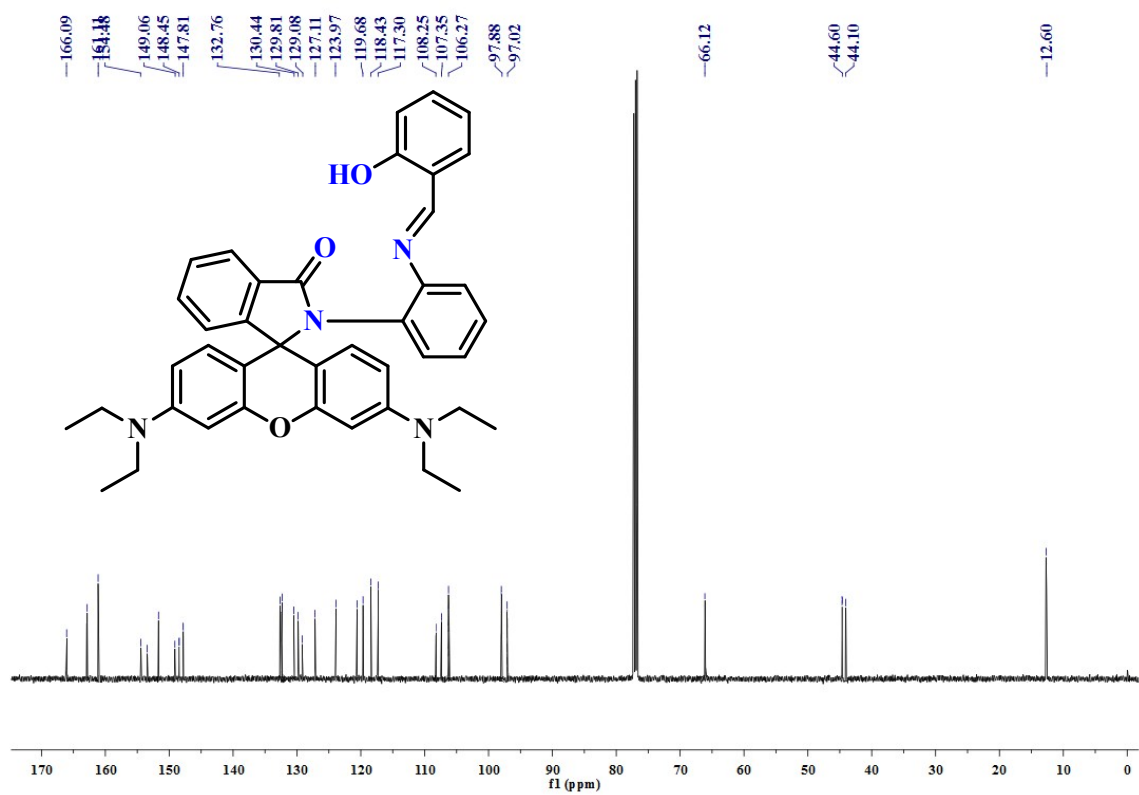

**Fig. S15** The <sup>1</sup>H NMR (a) and <sup>13</sup>C NMR (b) spectra of **BOS1** in CDCl<sub>3</sub>.

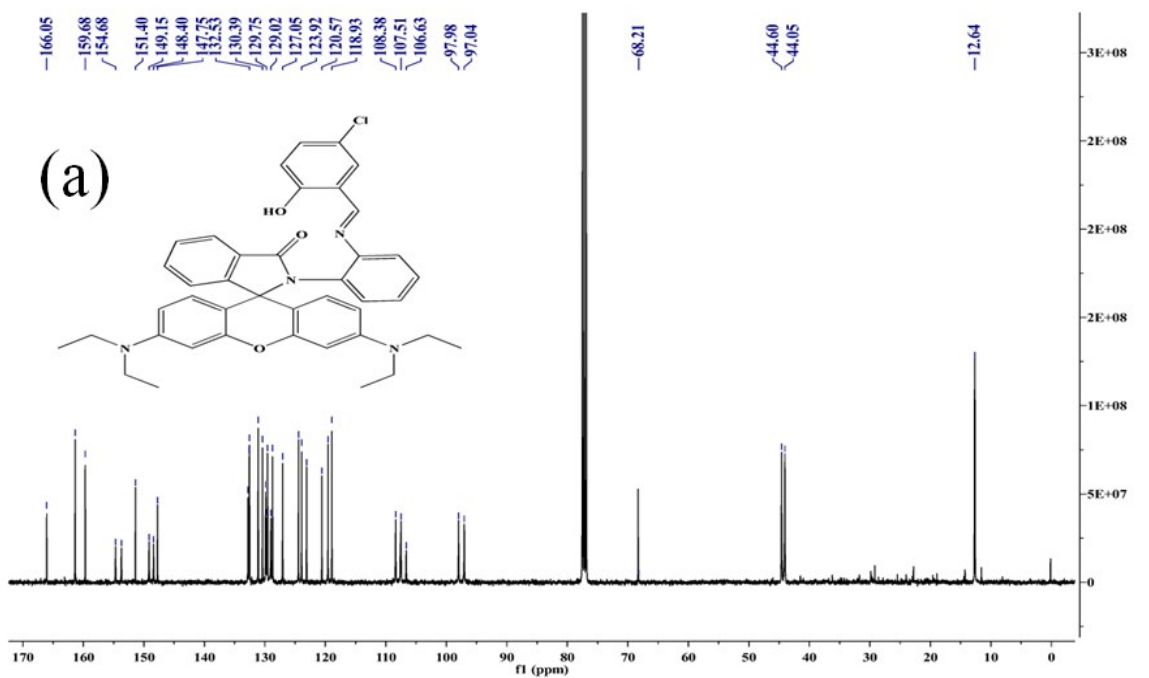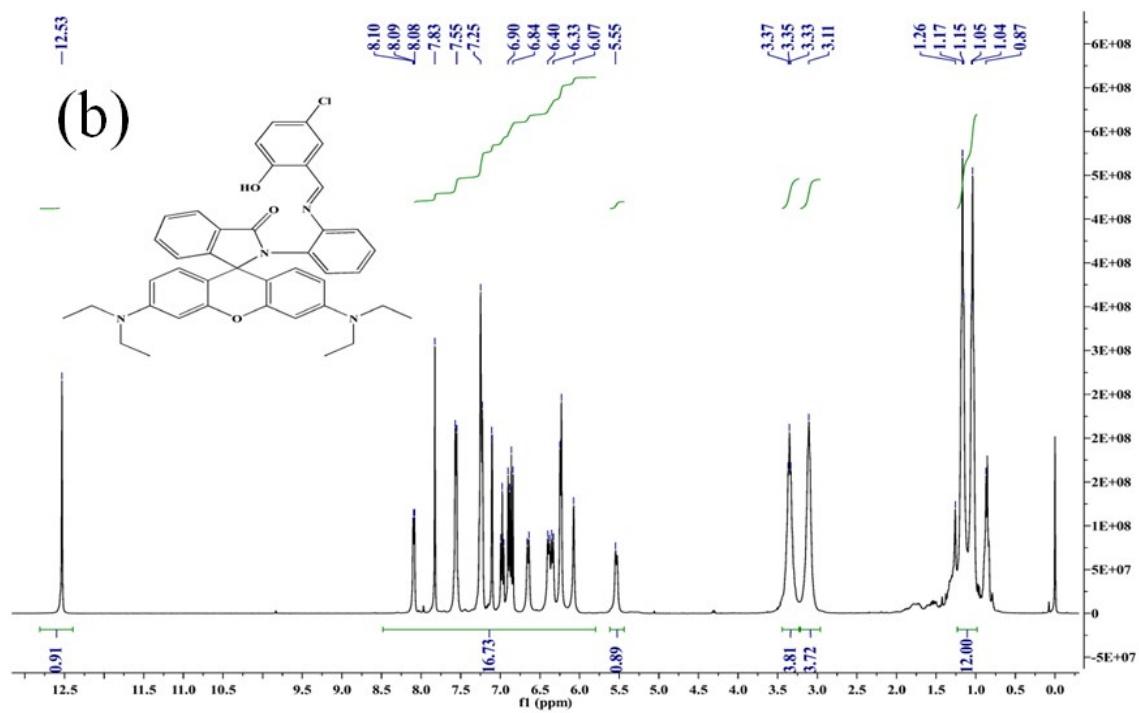

Fig. S16 The  $^{13}\text{C}$  NMR (a) and  $^1\text{H}$  NMR (b) spectra of **BOS2** in  $\text{CDCl}_3$ .
